# Supplementary material
Source: publisher site journal article supplement (http://www.degruyter.com/publication/journal_key/HTMP/downloadAsset/HTMP_Instruction%20for%20authors.pdf)
Supplement: Supplementary file 1 [file HTMP_Instruction%20for%20authors.pdf]

## Instruction for Authors

---

### SCOPE

***High Temperature Materials and Processes*** is a peer-reviewed, fully open access online journal, that publishes research, communications, reviews, special issues and news covering the areas of techniques and processes for studying of the structure, properties, and uses of high-temperature materials.

The journal covers theoretical and experimental papers on all aspects ranging from fundamental sciences to commercial applications regarding:

- High-temperature applications and behavior of metals and alloys, intermetallic compounds, oxide ceramics, and non-oxide ceramics such as nitrides, carbides, borides, and graphite
- Polymers, glasses and glassy metals, composite materials
- Oxidation and environmental attack, High-temperature corrosion
- Design with high-temperature materials
- Processes for achieving high temperature
- Processing of materials involving lasers, plasma, and arc sources
- Materials and processes involved in using solar energy
- Materials in nuclear energy applications
- Thermochemistry, Kinetics of reactions
- Liquid metal processing, Rapid solidification processes.

For the information on Article Processing Charges please view "Article Processing Charges" document (in PDF) published on the journal's website in the Supplementary Information section.

### CRITERIA FOR PUBLICATION

The primary criteria for judging the acceptability of a manuscript are: its originality, scientific importance and interest to the journal audience. See our Editorial Policy for more details

### Editorial Policy

#### Unpublished material

Submission of a manuscript implies that the work described is not copyrighted, published or submitted elsewhere, except in abstract form. The corresponding author should ensure that all authors approve the manuscript before its submission.

**Conflict of interest**

When authors submit a manuscript, they are responsible for recognizing and disclosing financial and/or other conflicts of interest that might bias their work and/or could inappropriately influence his/her judgment. If no specified acknowledgement is given, the Editors assume that no conflict of interest exists.

**Copyright**

All authors retain copyright, unless – due to their local circumstances – their work is not copyrighted. The copyrights are governed by the [Creative-Commons Attribution Only license \(CC-BY\)](#) which is compliant with Plan-S. A scanned copy of license should be sent to the journal, as soon as possible.

**Authorship**

Authorship should be limited to those who have made a significant contribution to the conception, design, execution, or interpretation of the reported study. All those who have made significant contributions should be listed as co-authors. Where there are others who have participated in certain substantive aspects of the research project, they should be named in an Acknowledgement section.

**Peer Review process**

The Editors reserve the right to decline the submitted manuscript without review, if the studies reported are not sufficiently novel or important to merit publication in the journal. Manuscripts deemed unsuitable (insufficient originality or of limited interest to the target audience) are returned to the author(s) without review. The Editor seeks advice from experts in the appropriate field. Research articles and communications are refereed by a minimum of two reviewers, review papers by at least three. The journal uses double-blind peer review model. Authors are requested to suggest persons competent to review their manuscript. However, please note that this will be treated only as a suggestion, and the final selection of reviewers is exclusively the Editor's decision. The final decision of acceptance is made by Managing Editor or, in case of conflict, by the Editor-in-Chief.

**Data Sharing Policy**

Effective June 2020, the journal requires authors to follow data sharing policy. Research data should be made widely available to the research community in order to demonstrate the robustness and validity of the research presented in the journal, to encourage replication of the results, and to provide the community with opportunities to learn. By publishing in the journal authors are required to provide a data availability statement (DAS) in their articles. Authors are encouraged to share their data but not required to. The decision to publish will not be affected by whether or not authors share their research data.

### Scientific Misconduct

This journal publishes only original manuscripts that are not also published or going to be published elsewhere. Multiple submissions/publications, or redundant publications (re-packaging in different words of data already published by the same authors) will be rejected. If they are detected only after publication, the journal reserves the right to publish a Retraction Note. In each particular case Editors will follow [COPE's Code of Conduct and implement its advice](#).

### ELECTRONIC SUBMISSION

*High Temperature Materials and Processes* encourages the submission of both substantial full-length bodies of work and shorter manuscripts that report novel findings. There are no specific length restrictions for the overall manuscript or individual sections; however, we urge the authors to present and discuss their findings in a concise and accessible manner. All submitted manuscripts must be written in English language.

Manuscripts submitted under multiple authorship are reviewed on the assumption that all listed authors concur in the submission and are responsible for its content; they must have agreed to its publication and have given the corresponding author the authority to act on their behalf in all matters pertaining to publication. The corresponding author is responsible for informing the coauthors of the manuscript status throughout the submission, review, and production process.

All submissions must be made electronically via the [Editorial Manager](#) - an online submission and peer review system. First-time users must create an Author account to obtain a user ID and password required to enter the system. All manuscripts receive individual identification codes that should be used in any correspondence with regard to the publication process. In case of any problems or difficulties with the manuscript submission website, please contact the Managing Editor [joanna.kosinska@degruyter.com](mailto:joanna.kosinska@degruyter.com).

### PUBLICATION FORMATS

*High Temperature Materials and Processes* considers submissions of:

- Research Article – The default format for reporting research results. There is no length restriction.
- Review Article – Used to submit literature reviews on a topic of interest. The article should contain a broad, balanced and fair perspective of the topic, identifying trends and/or gaps in the literature or providing a new synthesis of

existing literature. Reviews should be scientifically sound and should describe the most relevant and recent contributions.

- Mini-Review Article – A shorter form of a Review Article intended for a brief analysis of a focused topic on advances in the field. It discusses recent experimental research, highlights recent developments in fast-moving areas and suggests areas that require additional research.
- Communication – This format is intended for the presentation of brief observations that do not warrant full-length papers. An empirical report resulting from analysis of collected data to address one or more research questions and/or hypotheses.

### Electronic Formats Allowed

We accept submission of text, tables and figures as separate files or as a composite file. For your initial submission, we recommend you upload your entire manuscript, including tables and figures, as a single PDF file. If you are invited to submit a revised manuscript, please provide us with individual files: an editable text and publication-quality figures.

Text files can be submitted in the following formats:

- ❖ TeX, LaTeX,
- ❖ MS Word – standard DOCUMENT (.DOC)
- ❖ RICH TEXT FORMAT (.RTF)
- ❖ PDF (not applicable for re-submitted or accepted manuscripts, see below).

Tables should be submitted as MS Word or PDF (not applicable for re-submitted or accepted manuscripts, see below). Please note that a straight Excel file is not an acceptable format.

Graphics files can be submitted in any of the following graphic formats: EPS; BMP; JPG; TIFF; GIF or PDF. Please note that Powerpoint files are not accepted.

Any articles that have been prepared in LaTeX will be accepted for review, but only in PDF format. Post-acceptance, text files of the revised manuscript and tables are required for use in the production. Authors should clearly indicate the location(s) of tables and figures in the text if these elements are given separately or at the end of the manuscript. If this information is not provided to the editorial office, we will assume that they should be left at the end of the text.

### First-Time Submission of Manuscripts

It is important that authors include a cover letter with their manuscript. Please explain why you consider your manuscript to be suitable for publication in **High**

***Temperature Materials and Processes***, why your paper will inspire the other members of your field, and how will it drive research forward.

The cover letter should explicitly state that the manuscript (or one with substantially the same content, by any of the authors) has not been previously published in any language anywhere and that it is not under simultaneous consideration or in press by another journal. If related work has been submitted, then we may require a preprint to be made available. Reviewers will be asked to comment on the overlap between the related submissions.

Manuscripts that have been previously rejected, or withdrawn after being returned for modification, may be resubmitted if the major criticisms have been addressed. The cover letter must state that the manuscript is a resubmission, and the former manuscript number should be provided.

To ensure fair and objective decision-making, authors must declare any associations that pose a conflict of interest in connection with evaluated manuscripts (see Editorial Policy for details). Authors may suggest up to two referees not to use, and in such cases additional justification should be provided in the cover letter. Authors are encouraged to recommend up to five reviewers who are not members of their institution(s) and have never been associated with them or their laboratory(ies); please provide contact information for suggested reviewers. The Editors reserve the right to select expert reviewers at their discretion.

### **Submission of Revised Articles**

Resubmitted manuscripts should be accompanied by a letter outlining a point-by-point response to Editor's and reviewers' comments and detailing the changes made to the manuscript. A copy of the original manuscript should be included for comparison if the Editor requests one. If it is the first revision, authors need to return the revised manuscript within 28 days; if it is the second revision, authors need to return the revised manuscript within 14 days. Additional time for resubmission must be requested in advance. If the above mentioned deadlines are not met, the manuscript will be treated as a new submission.

For resubmitted manuscripts, please provide us with an editable text and publication-quality figures. Supply any figures as separate high-resolution, print-ready digital versions.

In addition to the editorial remarks, authors are asked to take care that they have prepared the revised version according to the Journal's style.

### ORGANIZATION OF THE MANUSCRIPT

We draw particular attention to the importance of carefully preparing the title, keywords and abstract, as these elements are indicators of the manuscript content in bibliographic databases and search engines.

#### Title

We suggest the title should be informative, specific to the project, yet concise (75 characters or fewer). Please bear in mind that a title that is comprehensible to a broad academic audience and readers outside your field will attract a wider readership. Avoid specialist abbreviations and non-standard acronyms. Titles

should not be presented in title case (words should not be capitalized). Please also provide a brief "running title" of not more than 50 characters.

#### Authors, Affiliations, Addresses

In the cover letter, provide the first names (or initials – if used), middle names (or initials – if used), and surnames for all authors. Affiliations should include:

- Department
- University or organization
- City
- Postal code
- State/province (if applicable)
- Country

One of the authors should be designated as the corresponding author to whom inquiries regarding the paper should be directed. It is the corresponding author's responsibility to ensure that the author list and the summary of the author contributions to the study are accurate and complete.

#### Abstract

The abstract should not exceed 200 words. The abstract should give a summary of the content of the paper. Mention the main findings without going into methodological detail and summarize briefly the most important items of the paper. The abstract should not contain literature citations, allusions to the tables, tables, figures or illustrations. All nonstandard symbols and abbreviations should be defined. In combination with the title and keywords, an abstract is an indicator of the content of the paper. Because the abstract will be published separately by

abstracting services, it must be complete and understandable without reference to the text.

### Keywords

List keywords for the work presented (maximum of 5), separated by commas. We suggest that keywords do not replicate those used in the title.

### Structure of a paper

Research papers and surveys should follow a strict structure. Generally, a standard scientific paper is divided into:

- **introduction:** present the subject of your paper clearly, indicate the scope of the subject, present the goals of your paper and finally the organization of your paper;
- **main text:** present all important elements of your scientific message; o conclusion: summarize your paper.

The journal is published in English. Make sure that your manuscript is clearly and grammatically written. The mathematical content should be understandable and should not cause any confusion to the readers, including the 5 referees. After accepting the manuscript for publication, we offer language check service for correcting small language mistakes.

### General rules for writing:

- use simple and declarative sentences, avoid long sentences, in which the meaning may be lost by complicated construction;
- use correct and established nomenclature whenever possible;
- make your argumentation complete; use commonly understood terms; define all nonstandard symbols and abbreviations when you introduce them;
- explain all acronyms and abbreviations when they first appear in the text; o use all units consistently throughout the article;
- be self-critical as you review your drafts.

### Footnotes/Endnotes

We encourage authors to restrict the use of footnotes. If necessary, please make endnotes rather than footnotes. A footnote/endnote may include:

- the designation of the corresponding author of the paper;
- the current address of an author (if different from that shown in the affiliation); o traditional footnote content.

Information concerning research grant support should appear in a separate Acknowledgements section at the end of the paper, not in a footnote. Acknowledgements of the assistance of colleagues or similar notes of appreciation should also appear in the Acknowledgements section, not in footnotes.

### **Acknowledgments**

This section should describe sources of funding that have supported the work. Please also describe the role of the study sponsor(s), if any, in study design, collection, analysis, and interpretation of data, writing the paper and decision to submit it for publication. Recognition of personal assistance should be given as a separate paragraph: people who contributed to the work, but do not fit the criteria for authors should be listed along with their contributions. You must ensure that anyone named in the acknowledgments agrees to being so named.

### **Conflict of interest**

To ensure fair and objective decision-making, authors must declare any association that poses a conflict of interest (financial, personal or professional) in connection with evaluated manuscripts. If there are no conflicts of interest, the following statement should be included before the References (or at the end of the Acknowledgments section):

*Conflict of interest*

*Authors state no conflict of interest*

### **References**

The journal's reference style is the Transportation Research Record (TRR) Style. A complete guide on how to prepare the reference list in TRR can be found below.

### **In-Text Citations**

Be sure that every in-text citation has a corresponding entry in the reference list. (Exception: personal communications)

References should be listed and numbered in the order that they appear in the text. In the text, citations should be indicated by the reference number in brackets [1]. A complete reference should give the reader enough information to find the relevant article. Multiple citations within a single set of brackets should be separated by commas [1, 5]. Where there are more than three sequential citations, they should be given as a range [1-4]. References in figure captions and tables should be listed after the references in the text. A complete reference should give the reader enough information to find the relevant article. Please pay particular attention to spelling, capitalization, and punctuation.



Please apply the following rules in preparing the reference list and for more details see the examples

1. Only references that have been cited in the body of the article should be included.
2. Organization: In the TRR Style, entries are listed and numbered in the order that they appear in the text.
3. The year is placed after the issue number or volume number (if issue number is not applicable), followed by a comma.
4. Authors' names: First author's name is followed by initials for first and middle names. In case of more than one author, before the surnames are initials for first and middle names, respectively. The initials of given names and surname are separated by a comma only in case of the first author.
5. Include all authors' names if an article has up to six authors; for work with seven or more authors, list the first six names followed by a comma and "et al."
6. For articles with two authors, please use "and" to separate the authors' names.
7. Formatting titles: Please do italicize names of journals.
8. Titles of books and articles: Only the first letter of the title's first word and any proper nouns should be capitalized. Do not enclose article titles in quotation marks.
9. The full name of any journal is required.
10. Page ranges: Include page ranges for articles in journals, magazines, newspapers and for chapters in books. When an article appears on discontinuous pages, list all pages or page ranges, separated by commas, e.g., pp. 145-149, 162-165.
11. Please use the abbreviation "pp." before the numbers (pp. 63-90).

\*\*\*

### Journal articles

#### [A journal article with 1 author](#)

[1] Naziri, E., Contribution of tocopherols and squalene to the oxidative stability of cold-pressed pumpkin seed oil (*Cucurbita pepo* L.). *European Journal of Lipid Science Technology*, Vol. 118, No. 6, 2016, pp. 898–905.

#### [A journal article with 2 authors](#)

[2] Abend, S. M., and N. Kulish. The psychoanalytic method from an epistemological viewpoint. *International Journal of Psychoanalysis*, Vol. 83, Part 2, 2002, pp. 491–495.

#### [A journal article with more than 6 authors](#)

[3] Dhananjaya, B. L., A. Nataraju, R. Rajesh, C. D. Raghavendra Gowda, B. K. Sharath, B. S. Vishwanath et al. Anticoagulant effect of *Naja naja* venom

5'nucleotidase: demonstration through the use of novel specific inhibitor, vanillic acid. *Toxicon*, Vol. 48, No. 4, 2006, pp. 411–421.

#### A Retraction article

[4] Feifel, D., C. Y. Moutier, and W. Perry. Safety and tolerability of a rapidly escalating dose-loading regimen for risperidone. *Journal of Clinical Psychiatry*, Vol. 63, No. 2, 2002, p. 169; Retraction of: Feifel, D., C. Y. Moutier, W. Perry. *Journal of Clinical Psychiatry*, Vol. 61, No. 12, 2000, pp. 909–911.

#### Electronic Journal Articles and Preprints

[5] Dionne, M. S. and D. S. Schneider. Screening the immune system. *Genome Biology*, 2002, <http://genomebiology.com/2002/3/4/reviews/1010>.

#### An article in press

[6] Kulig, P., B. A. Zabel, G. Dubin, S. J. Allen, T. Ohyama, J. Potempa et al. Staphylococcus aureus-derived staphopain B, a potent cysteine protease activator of plasma chemerin, *Journal of Immunology*, (in press), DOI: 12.3412/01.

#### Books and book chapters

##### An authored book

[7] Hollenbach M. Smart Materials. John Wiley & Sons, Inc., Hoboken, NJ, 2019.

##### An edited book

[8] Mathis, T., and L. G. Prose, Eds. Intelligent Materials and Structures. Springer, New York, NY, 2010.

##### A chapter in an authored book

[9] Sambrook, J. and D. W. Russell. Gastric emptying of a nutritionally balanced liquid diet. In *Molecular cloning - a laboratory manual*, 3rd edn, Daniel, E. E. and M. Godet, Eds, Cold Spring Harbor Laboratory Press, Cold Spring Harbor, 2001, pp. 83–92.

#### Conference proceedings

[10] Jones, R. T. Proceedings of the VII International Conference on Molten Slags, Fluxes and Salts, SAIMM, January 26–28, 2004, Cape Town Institute of Materials, 2005, pp. 363–376.

#### Theses and dissertations

Theses including Ph.D. dissertations, Master's theses or Bachelor theses follow the basic format outlined below.

### Doctoral dissertation

[11] Agutter, A. J. Analysis of sigma factors in *S. aureus*. Doctoral dissertation. Edinburgh University, Edinburgh, 1995.

### Newspaper articles

Unlike scholarly journals, newspapers do not usually have a volume and issue number. Instead, the full date and page number are required for a correct reference.

[12] Sherwin, J. A. The post-genomic era, *The Times*, July 13, 2007, p. 1

### Reports and patents

#### Report

[14] Government Accountability Office. Internal Revenue Service: 2001 Tax Filing Season, Systems Modernization, and Security of Electronic Filing. Publication GAO-01-595T. U.S. Government Printing Office, Washington, DC, 2001.

#### Patent

[13] Agutter, A. J. Analysis of sigma factors in *S. aureus*. U.S. Patent No. 1232, 1995.

### Personal Communication

Please do not include references to personal communication (e.g., letters, phone calls, conversations, text messages, emails, and interviews) in your reference list. Instead, we recommend placing them within the body of the paper and acknowledge them in a “Notes” section.

### In-text Citation:

... although this is not an easy thing to do (2008 letter from S Neifer to me), it is well worth the effort.

\*\*\*

### Formatting and Typesetting

All pages must be numbered consecutively. The font size should be no smaller than 12 points.

Footnotes and endnotes should be avoided. Allowable footnotes/endnotes may include: the designation of the corresponding author of the paper, the current address of an author (if different from that shown in the affiliation), abbreviations and acronyms.

**Figures and Figure Legends**

Authors may use photographs, schemes, diagrams, line graphs and bar charts to illustrate their findings. Figures should be suitable for onscreen viewing and desktop printing. High resolution images should be provided on request or on manuscript acceptance. The figures and their lettering should be clear and easy to read.

We remind authors that it is not acceptable scientific conduct to modify any separate element within an image. Figures should be numbered consecutively using Arabic numerals and referred to in the text by number. Figure legends should

follow the main text, each on a separate page. Each figure legend should have a concise title and should provide enough information so that the figure is understandable without frequent reference to the text.

**Tables and Table Captions**

Tables must include enough information to warrant table format and should be used only where information cannot be presented in the text. Please do not use graphics software to create tables. Tables occupying more than one printed page should be avoided, if possible; larger tables can be published as an appendix. Tables should be numbered consecutively using Arabic numerals and referred to in the text by number. Table legends should follow the main text, each on a separate page. Each table should have an explanatory caption which should be as concise as possible. The headings should be sufficiently clear so that the meaning of the data is understandable without reference to the text. Any citations should be indicated using the same style as outlined above.

**Supplemental Material**

We encourage authors to submit essential supplementary files that additionally support the authors' conclusions along with their manuscripts (the principal conclusions should be fully supported without referral to the supplemental material). Supplemental material will always remain associated with its article and is not subject to any modifications after publication. The decision to publish the material with the article if it is accepted will be made by the Editor. Supporting files of no more than 10 MB in may be submitted in a variety of formats, but should be publication-ready, as these files will be published exactly as supplied. Material must be restricted to large or complex data sets or results that cannot be readily displayed because of space or technical limitations. Material that has been published previously is not acceptable for posting as supplemental material. Supporting files should fall into one of the following categories:

- Dataset
- Additional Figure or Table
- Text
- Protocol
- Multimedia - Audio/Video/Animations (AVI, MPEG, WAV, Quicktime, animated GIF or Flash)

If the software required for users to view/use the supplemental material is not embedded in the file, you are urged to use shareware or generally available/easily accessible programs. To prevent any misunderstandings, we request that authors submit a text file (instruction.txt) containing a brief instruction on how to use the files supplied.

### **Symbols and abbreviations**

The use of special symbols, abbreviations, and acronyms is permitted so long as they are defined upon first mention in the article.

### **Outline of the Production Process**

Once an article has been accepted for publication, the manuscript files are transferred into our production system to be language-edited (in case it is required) and formatted. Language and technical editors reserve the privilege of editing manuscripts to conform with the stylistic conventions of the journal. Once the article has been typeset, PDF proofs are generated so that authors can approve all editing and layout.

### **Electronic Proofs**

Proofreading should be carried out once a final draft has been produced. Since the proofreading stage is the last opportunity to correct the article to be published, the authors are requested to make every effort to check for errors in their proofs before the paper is posted online. Please note that only essential changes can be made at this stage and extensive corrections, additions, or deletions will not be allowed.

Limit changes to correction of spelling errors, incorrect data, grammatical errors, and updated information for references to articles that have been submitted or are in press. If URLs have been provided in the article, recheck the sites to ensure that the addresses are still accurate and the material that you expect the reader to find is indeed there. Important new information that has become available between acceptance of the manuscript and receipt of the proofs may be inserted into the proof with the permission of the editor.

Additionally, authors may be asked to address remarks and queries from the language and/or technical editors. Queries are written only to request necessary information or clarification of an unclear passage or to draw attention to edits that may have altered the sense.

Please note that language/technical editors do not query at every instance where a change has been made. It is the author's responsibility to read the entire text, tables, and figure legends, not just items queried. Major alterations made will always be submitted to the authors for approval.

Manuscripts submitted under multiple authorship are published on the assumption that the final version of the manuscript has been seen and approved by all authors. The Corresponding author will receive e-mail notification when a downloadable PDF file is available and should return comments on the proofs within a maximum of 5 working days of receipt. Comments should be e-mailed according to received instruction. Please note that they should not be faxed, nor mailed or sent by a courier service to the Editorial Office

### **Immediate Publication**

Manuscripts ready for publication are promptly posted online. The manuscripts are considered to be ready for publication when the final proofreading has been performed by authors, and all concerns have been resolved. Authors should notice that no changes can be made to the articles after online publication.
